# Supplementary material for: Detection of Astrovirus in a Cow with Neurological Signs by Nanopore Technology, Italy
Source: PubMed Central journal article supplement (PMC7290991; doi:10.3390/v12050530), 2020-05-11
Supplement: viruses-12-00530-s001.pdf [file viruses-12-00530-s001.pdf]

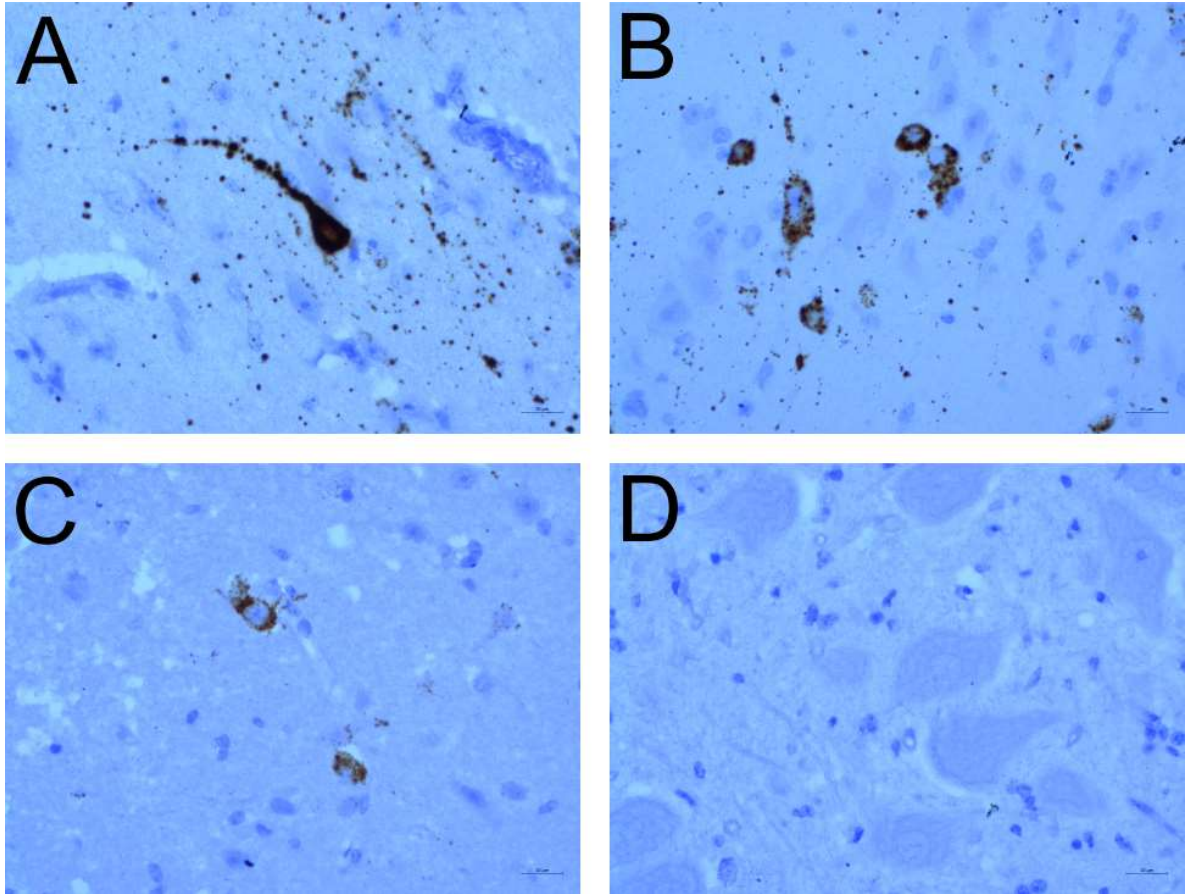

**Figure S1.** Detection of BoAstV CH13 RNA by chromogenic in-situ hybridization in neurons of the hippocampus of the BoAstV PE3373/2019/Italy case (A, B), the positive control brain tissue (C) and the negative control brain tissue (D). Microphotographs were taken at x40 magnification.
